# Supplementary material for: Probabilistic tsunami hazard assessment for the Makran region with focus on maximum magnitude assumption
Source: Copernicus journal article supplement (doi:10.5194/nhess-16-1339-2016), 2016-06-10
Supplement: Supplementary file 1 [file nhess-16-1339-2016-supplement.zip]

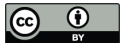

## *Supplement of*

# **Probabilistic tsunami hazard assessment for the Makran region with focus on maximum magnitude assumption**

**Andreas Hoechner et al.**

*Correspondence to:* Andreas Hoechner ([hoechner@gfz-potsdam.de](mailto:hoechner@gfz-potsdam.de))

- [nhess-16-1339-2016-supplement-title-page.pdf](#)
- [supp\\_1.dat](#)
- [supp\\_2.dat](#)
- [supp\\_3.dat](#)
- [supp\\_4.dat](#)
- [supp\\_5.dat](#)
- [supp\\_6.dat](#)
- [supp\\_7.dat](#)

The copyright of individual parts of the supplement might differ from the CC-BY 3.0 licence.
